# Supplementary material for: Understanding the puzzling chemistry of bicyclo[2.1.0]pentaneElectronic supplementary information (ESI) available: geometries, harmonic vibration frequencies, energies, and natural orbital occupancies for all stationary points discussed in the paper. See http://www.rsc.org/suppdata/ob/b3/b310676d/
Source: Royal Society of Chemistry journal article supplement (doi:10.1039/b310676d), 2003-12-18
Supplement: b310676d.doc [file b310676d.doc]

**Understanding the puzzling chemistry of bicyclo[2.1.0]pentane**

Barry K. Carpenter

*Department of Chemistry and Chemical Biology,*

*Baker Laboratory, Cornell University,*

*Ithaca, NY 14853-1301, USA.*

*Fax: +1 607 255 4137; Tel: +1 607 255 3826;*

*E-mail:* [*bkc1@cornell.edu*](mailto:bkc1@cornell.edu)

**Supporting Data**

Geometries, harmonic vibration frequencies, energies, and natural orbital occupancies for all stationary points discussed in the paper. Note: Vibration frequencies reported here are the original, unscaled values, whereas enthalpy differences reported in the paper were based on frequencies scaled by 0.932.

**Cyclopentane-1,3-diyl (Singlet State)**

CASSCF(8,8)/cc-pVDZ geometry (Å):

C 0.000000 1.188607 0.401606

C 0.000000 -1.188607 0.401606

C 0.000000 0.000000 1.332777

C -0.223636 0.752422 -1.021682

C 0.223636 -0.752422 -1.021682

H -0.232435 2.189513 0.742563

H 0.232435 -2.189513 0.742563

H 0.889807 0.006259 2.012820

H -0.889807 -0.006259 2.012820

H 0.328014 1.355427 -1.746359

H -0.328014 -1.355427 -1.746359

H -1.286427 0.824479 -1.286900

H 1.286427 -0.824479 -1.286900

CASSCF(8,8)/cc-pVDZ harmonic vibration frequencies (cm-1):

179.8987 195.1371 427.6258

443.8772 682.4601 760.9065

870.2343 916.1909 932.5711

952.3667 965.2394 1038.2756

1089.0769 1098.4923 1172.3053

1191.7259 1285.3399 1360.6890

1385.4678 1386.8521 1441.5617

1461.0288 1492.4521 1570.1136

1587.0835 2914.2669 2933.8884

3138.4299 3140.7200 3214.0757

3218.5510 3335.2653 3337.7650

CASSCF(8,8)/cc-pVDZ energy: -193.968096

CASPT2(8,8)-g3/cc-pVDZ energy: -194.592654

CASSCF(8,8)/cc-pVDZ enthalpy: -193.845510

CASSCF(8,8)/cc-pVDZ natural orbital occupancies:

A: 1.981478 1.980710 1.011256 0.020665

B: 1.978844 0.988451 0.019668 0.018928

**Transition State for Ring Closure of**

**Cyclopentane-1,3-diyl**

CASSCF(8,8)/cc-pVDZ geometry (Å):

C 0.375972 -1.180832 -0.164885

C 0.449935 1.161978 -0.003051

C -1.033362 -0.756284 0.160929

C -1.012453 0.799717 -0.076348

C 1.338744 -0.054224 0.146247

H -1.268957 -0.973346 1.208633

H -1.621318 1.351510 0.646601

H -1.785297 -1.256706 -0.450184

H -1.421397 1.022122 -1.067482

H 0.581665 -1.894866 -0.952183

H 0.817731 2.101206 -0.397033

H 2.215755 -0.033549 -0.543559

H 1.768798 -0.138501 1.177855

CASSCF(8,8)/cc-pVDZ harmonic vibration frequencies (cm-1):

215.1525i 110.7447 402.3657

440.1709 629.6018 696.5205

858.8933 908.7344 935.3197

945.6911 1005.4912 1049.8239

1108.2406 1129.5288 1194.3730

1223.7782 1298.8805 1352.8282

1360.9694 1403.2707 1437.0336

1458.4518 1508.9439 1575.5450

1594.8986 2899.6930 2966.3380

3159.4919 3165.6523 3194.4388

3238.6740 3333.7645 3338.0490

CASSCF(8,8)/cc-pVDZ energy: -193.964590

CASPT2(8,8)-g3/cc-pVDZ energy: -194.589775

CASSCF(8,8)/cc-pVDZ enthalpy: -193.842830

CASSCF(8,8)/cc-pVDZ natural orbital occupancies:

1.981670 1.980686 1.978447 1.217891

0.781605 0.020029 0.020599 0.019073

**Transition State for H Migration in**

**Cyclopentane-1,3-diyl**

CASSCF(8,8)/cc-pVDZ geometry (Å):

C 0.575334 -1.134498 0.100779

C 1.241519 0.189212 -0.025855

C 0.283520 1.229267 -0.204354

C -1.075729 0.655984 0.139134

C -0.895262 -0.887552 -0.129578

H 1.185814 -0.125074 1.162026

H 1.082277 -2.064251 -0.117995

H 2.309052 0.279844 -0.293734

H 0.522266 2.275479 -0.062542

H -1.305247 0.826178 1.201014

H -1.896371 1.081888 -0.439713

H -1.571014 -1.505792 0.462195

H -1.103070 -1.082748 -1.192006

CASSCF(8,8)/cc-pVDZ harmonic vibration frequencies (cm-1):

1791.6897i 231.6864 437.4996

579.0387 614.4033 676.5289

808.0290 884.0846 896.2384

915.5143 979.6079 1017.9747

1072.1636 1098.0149 1124.6978

1198.9641 1263.9363 1290.7835

1355.8072 1395.7114 1417.1084

1453.9420 1511.2817 1570.2283

1587.6732 2115.8106 3109.3754

3115.6694 3122.4356 3230.0426

3237.0824 3340.5321 3349.8773

CASSCF(8,8)/cc-pVDZ energy: -193.932015

CASPT2(8,8)-g3/cc-pVDZ energy: -194.574582

CASSCF(8,8)/cc-pVDZ enthalpy: -193.812620

CASSCF(8,8)/cc-pVDZ natural orbital occupancies:

1.980714 1.979862 1.967121 1.633312

0.368204 0.031891 0.019943 0.018952

**Transition State for Conrotatory**

**Ring Opening of Cyclopentane-1,3-diyl**

CASSCF(8,8)/cc-pVDZ geometry (Å):

C 0.000000 0.000000 1.304553

C 0.000000 1.201928 0.368639

C 0.000000 -1.201928 0.368639

C -0.424069 0.881900 -0.965523

C 0.424069 -0.881900 -0.965523

H 0.887363 0.018269 1.985739

H -0.887363 -0.018269 1.985739

H 0.692388 2.015942 0.543176

H -0.692388 -2.015942 0.543176

H -0.121827 1.556528 -1.765079

H -1.441634 0.526429 -1.096191

H 0.121827 -1.556528 -1.765079

H 1.441634 -0.526429 -1.096191

CASSCF(8,8)/cc-pVDZ harmonic vibration frequencies (cm-1):

1149.3554i 74.2078 322.3516

496.5774 568.9489 613.8121

698.7387 837.8132 887.8614

941.2815 957.3325 966.0186

991.7875 1093.0054 1123.9510

1154.5254 1182.2787 1274.2863

1278.5194 1389.4724 1447.4200

1463.7593 1508.9204 1597.6348

1607.7937 2916.7207 2935.6354

3240.8573 3243.6880 3310.2022

3312.9880 3333.5314 3334.1716

CASSCF(8,8)/cc-pVDZ energy: -193.936773

CASPT2(8,8)-g3/cc-pVDZ energy: -194.567408

CASSCF(8,8)/cc-pVDZ enthalpy: -193.815422

CASSCF(8,8)/cc-pVDZ natural orbital occupancies:

A: 1.981397 1.914226 0.487519 0.020622

B: 1.978096 1.513350 0.084350 0.020440

**Transition State for Disrotatory**

**Ring Opening of Cyclopentane-1,3-diyl**

CASSCF(8,8)/cc-pVDZ geometry (Å):

C 0.132494 0.969556 1.031660

C 0.132494 0.969556 -1.031660

C 0.132494 -0.471991 1.168906

C 0.132494 -0.471991 -1.168906

C -0.561227 -1.147147 0.000000

H -0.828750 1.465476 1.122154

H -0.828750 1.465476 -1.122154

H 0.939356 1.529482 1.497030

H 0.939356 1.529482 -1.497030

H 1.037547 -0.950222 1.533270

H 1.037547 -0.950222 -1.533270

H -1.656589 -0.923855 0.000000

H -0.452224 -2.253511 0.000000

CASSCF(8,8)/cc-pVDZ harmonic vibration frequencies (cm-1):

1358.5697i 241.2263 272.1377

502.6396 516.1423 709.5504

711.0345 772.3118 902.6027

931.2634 937.6135 951.5582

989.5114 1039.0442 1072.5528

1179.8632 1205.2919 1249.8095

1284.0654 1342.7289 1438.8087

1458.0032 1495.9372 1584.1610

1592.6349 2944.5708 3024.4183

3252.4884 3259.8662 3287.1421

3291.5705 3330.2112 3342.0278

CASSCF(8,8)/cc-pVDZ energy: -193.926274

CASPT2(8,8)-g3/cc-pVDZ energy: -194.550107

CASSCF(8,8)/cc-pVDZ enthalpy: -193.806254

CASSCF(8,8)/cc-pVDZ natural orbital occupancies:

A': 1.981810 1.978171 1.893664 0.895178 0.020187 0.019878

A": 1.104902 0.106210

**Trimethylene (Singlet State)**

CASSCF(6,6)/cc-pVDZ geometry (Å):

C 0.000000 1.262356 -0.292604

C 0.000000 0.000000 0.517743

C 0.000000 -1.262356 -0.292604

H -0.614892 1.324649 -1.182225

H 0.279223 2.196614 0.178173

H 0.885857 0.005332 1.206449

H -0.885857 -0.005332 1.206449

H 0.614892 -1.324649 -1.182225

H -0.279223 -2.196614 0.178173

CASSCF(6,6)/cc-pVDZ harmonic vibration frequencies (cm-1):

159.8373 270.6822 399.2763

518.3534 525.2998 813.0711

949.2005 1062.3205 1135.1315

1159.8422 1293.7715 1428.1511

1465.2036 1556.7142 1570.5944

2888.7338 2911.1674 3285.9436

3289.1441 3392.9059 3393.6840

CASSCF(6,6)/cc-pVDZ energy: -117.036433

CASPT2(6,6)-g3/cc-pVDZ energy: -117.401622

MRCISD+Q/cc-pVTZ energy: -117.554295

CASSCF(6,6)/cc-pVDZ enthalpy: -116.954376

CASSCF(6,6)/cc-pVDZ natural orbital occupancies:

A: 1.980828 1.086574 0.020835

B: 1.978294 0.913177 0.020292

**Trimethylene Conrotatory Ring-Closure Transition State**

CASSCF(6,6)/cc-pVDZ geometry (Å):

C 0.000000 1.253294 -0.294043

C 0.000000 0.000000 0.531997

C 0.000000 -1.253294 -0.294043

H -0.700238 1.351124 -1.113868

H 0.455577 2.158584 0.085123

H 0.873584 0.001866 1.197012

H -0.873584 -0.001866 1.197012

H 0.700238 -1.351124 -1.113868

H -0.455577 -2.158584 0.085123

CASSCF(6,6)/cc-pVDZ harmonic vibration frequencies (cm-1):

205.4342i 261.6489 356.8856

416.2665 449.2987 773.3600

956.9047 1098.4133 1103.5385

1162.9823 1307.8366 1418.1880

1461.6313 1556.8684 1570.2676

2891.7875 2918.8603 3295.0107

3298.2229 3404.6441 3404.7864

CASSCF(6,6)/cc-pVDZ energy: -117.036355

CASPT2(6,6)-g3/cc-pVDZ energy: -117.402394

MRCISD+Q/cc-pVTZ energy: -117.555038

CASSCF(6,6)/cc-pVDZ enthalpy: -116.955541

CASSCF(6,6)/cc-pVDZ natural orbital occupancies:

A: 1.980951 1.151415 0.020769

B: 1.978063 0.848406 0.020396

**Trimethylene H Migration Transition State**

CASSCF(6,6)/cc-pVDZ geometry (Å):

C 1.248128 0.223484 -0.022652

C -0.036348 -0.454565 -0.004192

C -1.273800 0.217813 -0.034801

H 0.520245 -0.371590 1.127868

H 2.146168 -0.327686 -0.309948

H 1.294002 1.314969 -0.047381

H -0.049534 -1.503168 -0.362198

H -2.208740 -0.339972 0.030295

H -1.330020 1.307054 -0.068767

CASSCF(6,6)/cc-pVDZ harmonic vibration frequencies (cm-1):

1570.8259i 383.1096 422.9192

551.2444 623.8911 655.4585

888.6532 973.7947 988.1618

1243.9368 1274.1788 1302.1834

1483.6258 1564.7491 1626.0757

2189.6631 3064.8237 3295.4961

3302.9433 3407.2708 3410.9868

CASSCF(6,6)/cc-pVDZ energy: -117.010250

CASPT2(6,6)-g3/cc-pVDZ energy: -117.395161

MRCISD+Q/cc-pVTZ energy: -117.545282

CASSCF(6,6)/cc-pVDZ enthalpy: -116.930817

CASSCF(6,6)/cc-pVDZ natural orbital occupancies:

1.980031 1.968235 1.680319

0.321476 0.030401 0.019538

**Transition State for Addition of Fumaronitrile to Bicyclo[2.1.0]pentane**

CASSCF(8,8)/6-31+G(d,p) geometry (Å):

C 2.507260 -1.057772 0.918572

C 0.607474 -0.546512 -0.019903

C 2.938813 -0.765232 -0.513774

C 1.606931 -0.340978 -1.169393

C 1.319570 -0.220083 1.271136

H 3.353670 -1.644581 -0.991324

H 1.360787 -0.951300 -2.030174

H 1.621125 0.695862 -1.492504

H 3.696877 0.012789 -0.553405

H 0.089263 -1.494301 -0.023978

H 2.580945 -2.060869 1.303662

H 0.797324 -0.547283 2.160393

H 1.556177 0.836265 1.354257

C -2.187245 0.338679 0.373832

C -1.101530 0.704440 -0.422640

C -2.976424 -0.806007 0.055981

C -0.512299 2.007472 -0.195331

N -3.610926 -1.730909 -0.195926

N -0.019831 3.025422 -0.007711

H -2.375341 0.814483 1.316964

H -1.087893 0.382036 -1.447832

CASSCF(8,8)/6-31+G(d,p) harmonic vibration frequencies (cm-1):

788.45i 39.86 55.37 95.33 127.22

146.85 167.70 196.08 272.81 279.75

315.12 422.39 463.82 501.77 571.37

594.95 615.05 683.72 730.01 846.76

899.72 929.50 970.26 1016.25 1025.21

1052.64 1087.48 1092.87 1098.06 1141.26

1194.30 1295.56 1309.36 1317.26 1364.88

1378.87 1384.10 1417.24 1446.73 1468.42

1475.51 1599.65 1607.63 1620.85 1635.06

2439.04 2503.19 3173.87 3187.78 3193.08

3248.62 3266.04 3268.42 3315.03 3352.47

3370.43 3377.99

CASSCF(8,8)/6-31+G(d,p) energy: -455.490161

CASSCF(12,12)/6-31+G(d,p) energy: -455.593723

CASPT2(8,8)-g3/6-31G(d,p) energy: -456.954941

CASSCF(8,8)/6-31+G(d,p) enthalpy: -455.304478

CASSCF(8,8)/6-31+G(d,p) natural orbital occupancies:

1.946280 1.941397 1.889711 1.468094

0.534740 0.113205 0.056797 0.049776

CASSCF(12,12)/6-31+G(d,p) natural orbital occupancies:

1.944603 1.940706 1.939357 1.938434 1.892933 1.481008

0.522123 0.110359 0.061887 0.060386 0.057240 0.050965

**Fumaronitrile + Bicyclo[2.1.0]pentane**

CASSCF(8,8)/6-31+G(d,p) geometry (Å):

C 2.707321 -1.363878 0.794455

C 1.320891 -1.258099 0.113867

C 3.367344 -0.759647 -0.443420

C 1.973883 -0.653814 -1.129173

C 1.660368 -0.434792 1.316638

H 4.020578 -1.454441 -0.957839

H 1.900267 -1.293926 -2.000658

H 1.642023 0.344527 -1.401668

H 3.905242 0.169909 -0.282849

H 0.501678 -1.956031 0.112535

H 3.117977 -2.152955 1.399156

H 1.190167 -0.743008 2.236097

H 1.789389 0.633978 1.227094

C -2.465654 0.531731 0.364206

C -1.731545 1.168643 -0.566995

C -3.180469 -0.679118 0.059931

C -1.006596 2.372859 -0.260812

N -3.753189 -1.646403 -0.165871

N -0.421639 3.332403 -0.033610

H -2.543038 0.895055 1.371610

H -1.649995 0.802087 -1.572957

CASSCF(8,8)/6-31+G(d,p) harmonic vibration frequencies (cm-1):

122.63 148.05 279.69 286.49 319.62

445.85 464.74 572.88 586.90 745.10

766.27 772.46 841.37 855.25 965.05

979.67 1004.35 1005.93 1036.91 1058.52

1059.95 1080.70 1090.22 1121.62 1194.37

1195.24 1219.00 1296.50 1316.72 1362.80

1368.18 1370.03 1389.42 1421.36 1462.50

1581.11 1597.06 1613.64 1748.61 2491.38

2500.86 3185.14 3199.48 3238.14 3243.50

3259.62 3319.17 3325.80 3343.43 3375.44

3379.15

CASSCF(8,8)/6-31+G(d,p) energy: -455.550684

CASSCF(12,12)/6-31+G(d,p) energy: -455.654979

CASPT2(8,8)-g3/6-31G(d,p) energy: -457.004379

CASSCF(8,8)/6-31+G(d,p) enthalpy: -455.364273

CASSCF(8,8)/6-31+G(d,p) natural orbital occupancies:

1.946432 1.940517 1.888205 1.971732

0.121094 0.056471 0.028274 0.047275

CASSCF(12,12)/6-31+G(d,p) natural orbital occupancies:

1.971895 1.944684 1.939935 1.938561 1.938548 1.893476

0.116224 0.061855 0.061050 0.057233 0.048426 0.028112
